# 1 **Genome-wide fitness assessment during diurnal growth reveals an** 2 **expanded role of the cyanobacterial circadian clock protein KaiA**

3 David G. Welkie<sup>1</sup>, Benjamin E. Rubin<sup>2</sup>, Yong-Gang Chang<sup>3</sup>, Spencer Diamond<sup>2,4</sup>, Scott A.  
4 Rifkin<sup>2</sup>, Andy LiWang<sup>3</sup>, Susan S. Golden<sup>1,2</sup>

5 <sup>1</sup>Center for Circadian Biology, University of California, San Diego, La Jolla, CA; <sup>2</sup>Division of  
6 Biological Sciences, University of California San Diego, La Jolla CA; <sup>3</sup>School of Natural  
7 Sciences, University of California, Merced, CA; <sup>4</sup>Department of Earth and Planetary Science,  
8 University of California, Berkeley, CA.

9

## 10 **Abstract**

11 The recurrent pattern of light and darkness generated by Earth's axial rotation has profoundly  
12 influenced the evolution of organisms, selecting for both biological mechanisms that respond  
13 acutely to environmental changes and circadian clocks that program physiology in anticipation  
14 of daily variations. The necessity to integrate environmental responsiveness and circadian  
15 programming is exemplified in photosynthetic organisms such as cyanobacteria, which depend  
16 on light-driven photochemical processes. The cyanobacterium *Synechococcus elongatus* PCC  
17 7942 is an excellent model system for dissecting these entwined mechanisms. Its core circadian  
18 oscillator, consisting of three proteins KaiA, KaiB, and KaiC, transmits time-of-day signals to  
19 clock-output proteins, which reciprocally regulate global transcription. Research performed  
20 under constant light facilitates analysis of intrinsic cycles separately from direct environmental  
21 responses, but does not provide insight into how these regulatory systems are integrated during  
22 light-dark cycles. Thus, we sought to identify genes that are specifically necessary in a day-night  
23 environment. We screened a dense bar-coded transposon library in both continuous light and  
24 daily cycling conditions and compared the fitness consequences of loss of each nonessential  
25 gene in the genome. Although the clock itself is not essential for viability in light-dark cycles, the  
26 most detrimental mutations revealed by the screen were those that disrupt KaiA. The screen  
27 broadened our understanding of light-dark survival in photosynthetic organisms, identified  
28 unforeseen clock-protein interaction dynamics, and reinforced the role of the clock as a negative  
29 regulator of a night-time metabolic program that is essential for *S. elongatus* to survive in the  
30 dark.

## 31 **Significance**

32 Understanding how photosynthetic bacteria respond to and anticipate natural light-dark cycles  
33 is necessary for predictive modeling, bioengineering, and elucidating metabolic strategies for  
34 diurnal growth. Here, we identify the genetic components that are important specifically under  
35 light-dark cycling conditions and determine how a properly functioning circadian clock prepares  
36 metabolism for darkness, a starvation period for photoautotrophs. This study establishes that  
37 the core circadian clock protein KaiA is necessary to enable rhythmic de-repression of a night-  
38 time circadian program.

## 39 **Specific Contributions**

40 DGW BR SD and SSG conceived and designed the project. DGW BR and YGC performed the  
41 experiments and analyzed the data. SAR wrote the R scripts for RB-TnSeq conditional fitness  
42 analysis. YGC and AL interpreted fluorescence anisotropy data. DGW BR SSG YGC and AL  
43 wrote the manuscript.

44 \body

## 45 Introduction

46 Photosynthetic organisms experience a dramatic change in physiology and metabolism each  
47 day when the sun sets and the daytime processes related to photosynthesis become  
48 inoperative. Like many diverse organisms throughout nature, prokaryotic cyanobacteria have  
49 evolved circadian clocks that aid in the temporal orchestration of activities that are day- or night-  
50 appropriate. The circadian clock's contribution towards fitness in changing environments was  
51 first demonstrated in 1998, when it was shown that strains of the cyanobacterium  
52 *Synechococcus elongatus* PCC 7942 with intrinsic circadian periods that match that of external  
53 light-dark cycles (LDC) outcompete strains that have different periods (1, 2). More recent  
54 experiments showed the value of preparing for night: when cells synchronized to different  
55 phases of the circadian cycle are mixed and then exposed to a pulse of darkness, those whose  
56 internal clock corresponds to a dawn or day-time phase have a higher occurrence of arrested  
57 growth upon re-illumination than those synchronized to anticipate darkness at the time of the  
58 pulse (3). These data support the hypothesis that the clock acts to prepare the cell for  
59 conditions that are predictable and recurrent, such as night following day.

60 A fitness advantage of appropriate circadian timing signals is not exclusive to cyanobacteria, as  
61 is observed in the model plant *Arabidopsis* (4, 5) and in humans, where circadian disruption can  
62 result in myriad adverse health effects including cardiovascular disease, cancer, and sleep  
63 disorders (6–8). Although the fundamental properties of circadian rhythms are shared across  
64 the domains of life, the molecular networks that generate them vary (9). In *S. elongatus* a three-  
65 protein oscillator comprising the proteins KaiA, KaiB, and KaiC sets up a circadian cycle of KaiC  
66 phosphorylation. This oscillator even functions *in vitro* when mixed at appropriate ratios with  
67 ATP (10), which has provided a powerful tool for exploring the mechanism that generates  
68 circadian rhythms. Genetic, biochemical, metabolic, and structural inquiries have revealed that  
69 the *S. elongatus* oscillator actively turns off a night-time metabolic program prior to dawn by  
70 triggering the dephosphorylation of the master transcription factor Regulator of Phycobilisome  
71 Association A (RpaA). It accomplishes this task by recruiting Circadian Input Kinase A (CikA) to  
72 a ring of KaiB that forms on KaiC during the night-time portion of the cycle, thus activating CikA  
73 phosphatase activity against RpaA (11–13). Among the targets of the RpaA regulon are the  
74 genes that facilitate catabolism of glycogen and generation of NADPH via the oxidative pentose  
75 phosphate pathway (14). These enzymatic reactions are essential for the cyanobacterium to  
76 survive the night when photosynthetic generation of reductant is disabled (15, 16).

77 While the molecular mechanisms of the circadian clock are well established in constant light for  
78 *S. elongatus* (17), its role in response to LDC, and the mechanisms by which the cell integrates  
79 circadian and environmental data, are still not understood. There have been few publications on  
80 the topic, and this study is the first to report on a genome-wide screen for LDC-sensitive  
81 mutants. Studies that report conditional LDC effects have been limited to a small number of  
82 genes. For instance, mutants defective for the circadian clock output pathway genes, *rpaA* and  
83 *sasA* (15, 16, 18, 19), and mutants unable to mobilize carbon through the oxidative pentose  
84 phosphate pathway (OPPP) and glycogen breakdown (16, 20, 21), or unable to synthesize the  
85 alarmone nucleotide ppGpp (22, 23), have conditional defects specific to growth in LDC. To  
86 identify the genetic contributors to fitness under LDC and acquire a more comprehensive picture  
87 of the regulatory network, we used an unbiased population-based screen that tracks the fitness  
88 contributions of individual *S. elongatus* genes to reproduction in diel cycles. The method,  
89 random bar code transposon-site sequencing (RB-TnSeq), quantitatively compares the changes  
90 in abundances of individuals in a pooled mutant population over time. This assay allowed the  
91 calculation of a fitness contribution to LDC survival for each nonessential gene in the genome  
92 by leveraging multiple inactivating mutations spread across a genomic locus. This library was  
93 previously used to identify the essential gene set of *S. elongatus* under standard laboratory

94 continuous light conditions (CLC) (24) and to generate an improved the metabolic model for  
95 generating phenotype predictions (25).

96 The results described here provide a comprehensive picture of genes that contribute to fitness  
97 under diurnal growth conditions. In addition to identifying the genetic components previously  
98 known to be critical for growth in LDC we found ~100 new genes whose mutation confers weak  
99 to strong fitness disadvantages. Of these genes, we focused on the top-scoring elements for  
100 LDC-specific defects which, unexpectedly, lie within the *kaiA* gene of the core circadian  
101 oscillator. As no previously known roles for KaiA predicted this outcome, we characterized the  
102 mechanism that underlies the LDC sensitivity of a *kaiA*-null mutant, and revealed interactions  
103 within the oscillator complex that regulate the activation of CikA, an RpaA phosphatase.

## 104 **Results**

### 105 ***Growth of library mutants to assess genetic fitness contributions under light-dark cycles.***

106 The RB-TnSeq mutant library includes a unique identifier sequence, or bar code, at each  
107 insertion site to track each transposon-insertion mutant. Next-generation sequencing is used to  
108 quantify these bar codes within the total DNA of the population, such that the survival and  
109 relative fitness of the approximately 150,000 mutants in the library can be tracked under control  
110 and experimental conditions (26). In this way, the *S. elongatus* RB-TnSeq library can be used  
111 for pooled, quantitative, whole-genome mutant screens.

112 First, the library was thawed, placed into 250-mL flasks, and sampled during incubation in CLC  
113 under only the selective pressure for the transposon antibiotic-resistance marker. Genomic DNA  
114 was extracted, and the bar codes of the mutant population were sequenced to establish a  
115 baseline abundance (**Fig. 1**). The culture was then divided into photobioreactors set to maintain  
116 constant optical density under either CLC, or LDC conditions that mimic day and night. After a  
117 treatment period allowing for approximately 6 generations, the library was again sampled and  
118 bar codes were quantified in a similar fashion. By comparing the frequencies of the bar codes  
119 after growth in LDC to those in CLC (**Dataset S1**), we estimated a quantitative measure of the  
120 fitness contribution for each gene specifically under LDC (**Dataset S2**).

121 After filtering the data as described in the Materials and Methods section we were able to  
122 analyze insertions in 1,872 of the 2,005 non-essential genes (24) in the genome. Each fitness  
123 score that passed our statistical threshold for confidence (FDR <1%) was classified as having a  
124 “strong” (>1.0 or <-1.0), “moderate” (between 1.0 and 0.5 or -1.0 and -0.5), or “negligible /  
125 minor” (between 0 and ±0.5) effect on fitness in LDC. This analysis revealed 90 loci whose  
126 disruption caused strong changes to LDC fitness (41 negatively and 49 positively) and an  
127 additional 130 loci that had moderate effects (**Fig. 2A**). A volcano plot showing the data with  
128 selected genes highlighted in this study is displayed in **Fig. 2B**. Because our initial goal was to  
129 understand the suite of genes required to survive the night, we focused first on those mutants  
130 whose loss specifically debilitates growth in LDC.

### 131 ***Metabolic pathways important for LDC growth***

132 The functional composition of genes found to be either detrimental or favorable to fitness is  
133 indicative of the metabolic processes that are important for growth in LDC (**Fig. 2C**). Genes  
134 identified as necessary in LDC encode enzymes that participate in carbohydrate and central  
135 carbon metabolism, protein turnover and chaperones, CO<sub>2</sub> fixation, and membrane biogenesis.  
136 Strikingly, all genes of the OPPP, *zwf*, *opcA*, *pgl*, and *gnd*, have strong fitness effects (**Fig. 3A**).  
137 In addition, *tal*, the only non-essential gene of the reductive phase, is also essential for LDC  
138 growth. It is known that *tal* mRNA peaks at dusk and that its product acts in a reaction that is  
139 shared between the oxidative and reductive phases of the pentose phosphate pathway, linking it  
140 to glycolysis; the *tal* mutant’s sensitivity to LDC supports the hypothesis that Tal is a less

141 recognized, but important, component of the OPPP reactions. Furthermore, all OPPP genes  
142 have peak expression at dusk (27).

143 Disruptions in genes that encode enzymes responsible for glycogen metabolism previously  
144 have been shown to cause LDC sensitivity (21). Our screen clearly identified the genes for  
145 catabolic glycogen metabolism *glgX* and *glgP* as important LDC fitness factors (**Fig. 2B**).  
146 However, the importance of glycogen metabolism in LDC fitness is complicated by evidence  
147 that the anabolic reactions of *glgA* and *glgC* contribute to fitness in CLC as well, due to the  
148 utilization of glycogen as a sink for excess photosynthetically derived electrons (28, 29). Thus,  
149 for genes critical for glycogen anabolism, the differential LDC fitness score is not as striking as  
150 might be expected from phenotypic assays of those mutants. The *glgA* mutants were classified  
151 as having a minor LDC defect, and insufficient reads for *glgC* removed this locus from our  
152 analysis pipeline, leading to a classification of “not determined”. Despite this complication,  
153 mutations in the gene *glgB*, whose product catalyzes the last non-essential step in glycogen  
154 synthesis, caused a strong decrease in LDC fitness, supporting the conclusion that both  
155 glycogen synthesis and breakdown are critical aspects of metabolism in LDC conditions.  
156 Together, the reactions facilitated by these enzymes provide a major source of reductant  
157 (NADPH) in the dark and facilitate the flow of glucose compounds via the breakdown of stored  
158 glycogen into downstream metabolites.

159 Genes involved in DNA repair (such as the transcription-repair coupling factor *mdf*) and  
160 chaperone systems (*clpB1*) are also important for light-dark growth. ClpB1 is known to  
161 contribute to thermotolerance stress and is induced upon dark-light transitions in cyanobacteria  
162 (30, 31). The importance of these genes for surviving light-dark cycles suggests a role in  
163 managing light-induced stress that the transition from dark to light may impose. Moreover,  
164 mutation of any of the three genes that encode enzymes of the glycine cleavage system confer  
165 increased LDC fitness. The glycine decarboxylase complex (GDC) is linked to photorespiratory  
166 mechanisms that respond to high-light stress (32, 33). This result further supports our finding  
167 that variations in the fitness of metabolism genes between CLC and LDC are linked to pathways  
168 that mitigate light stress.

169 In addition to underscoring the importance of the OPPP, glycogen metabolism, and repair  
170 mechanisms in LDC, we also found a strong link between these metabolic pathways and  
171 circadian clock management. Many of the genes essential for growth in LDC are regulated by  
172 the clock output protein RpaA. For instance, the circadian clock gene *kaiC* is itself regulated by  
173 RpaA and its expression is reduced by over 50% in an *rpaA*-null background (12, 14). This  
174 attribute is also shared by the core glycogen metabolism and pentose phosphate pathway  
175 genes *glgP*, *zwf*, *opcA*, *gnd*, and *tal*, and genes involved with metal ion homeostasis (*smtA*) and  
176 cobalamin biosynthesis (*cobL*), all of which show significantly reduced transcripts ( $<-1.0$   
177  $\log_2(\Delta rpaA/WT)$ , wild type) in the absence of the RpaA (14). These core glycogen metabolism  
178 and pentose phosphate pathway genes, with the exception of *tal* and *gnd*, are also direct targets  
179 of the transcription factor. This finding is a common trend in mutants that show strong fitness  
180 decreases in LDC, as ~20% (9/41) have dramatic reductions in mRNA levels in an *rpaA*-null  
181 strain. This trend is not the case for any of the genes identified as mutants that confer increased  
182 fitness (**Fig 3B**). These findings support a growing body of evidence that the ability of *S.*  
183 *elongatus* to initiate a night-time transcriptional program, and particularly to activate the OPPP  
184 pathway genes, is critical for survival through darkness (15, 16).

### 185 ***Fitness contributions of circadian clock constituents***

186 The mechanism of circadian timekeeping and regulation in cyanobacteria is well understood at  
187 the molecular level (17, 34). The three core clock proteins, KaiA, KaiB, and KaiC orchestrate  
188 circadian oscillation in *S. elongatus* (35), whereby KaiC undergoes a daily rhythm of



189 phosphorylation and dephosphorylation that provides a time indicator to the cell (36, 37). During  
190 the day period, KaiA stimulates KaiC autophosphorylation, and, during the night, KaiB opposes  
191 KaiA's stimulatory activity by sequestering an inactive form of KaiA (38), leading to KaiC  
192 autodephosphorylation. Two histidine kinase proteins, SasA and CikA, engage with the  
193 oscillator at different phases of the cycle. Binding to KaiC stimulates SasA to phosphorylate  
194 RpaA, with interaction increasing as KaiC phosphorylation increases. Later, binding of CikA to  
195 the KaiC-KaiB complex stimulates CikA phosphatase activity to dephosphorylate RpaA. Thus,  
196 activated CikA opposes the action of SasA. This progression causes phosphorylated RpaA to  
197 accumulate during the day, peaking at the day-night transition, and activates the night-time  
198 circadian program.

199 Mutations that caused the most serious defect specifically in LDC were mapped to the gene that  
200 encodes the clock oscillator component KaiA (**Fig. 2B**). This outcome was unexpected because  
201 the known roles of KaiA are to stimulate phosphorylation of KaiC and to enable normal levels of  
202 KaiC and KaiB expression (38, 39). Thus, a KaiA-less strain, in which KaiC levels are low and  
203 hypophosphorylated (39), was expected to behave like a *kaiC* null. A *kaiC* null mutant has no  
204 notable defect in LDC when grown in pure culture (1), and even a *kaiABC* triple deletion,  
205 missing KaiA as well as KaiB and KaiC, grows well in LDC (18).

206 Nonetheless, a *kaiC* null mutant is known to be outcompeted by WT under LDC conditions in  
207 mixed culture (1, 2), which is the situation in this population-based screen. Mutations in *kaiC*  
208 returned negative fitness scores in the current screen, as did bar codes associated with *rpaA*  
209 and *sasA*, two clock-related genes that are known to be important for growth in LDC (18, 20).  
210 RpaA is important for redox balancing, metabolic stability, and carbon partitioning during the  
211 night, and an *rpaA* mutant is severely impaired in LDC (15, 16, 20). While it is identified in the  
212 current screen as LDC sensitive, inactivation of *rpaA* also confers a moderate fitness decrease  
213 under CLC (~-1.0), thus diminishing the differential LDC-specific fitness calculation.

214 Disruptions to other genes related to circadian clock output scored as beneficial to growth in  
215 LDC, increasing the fitness of the strains against the members of the population that carry an  
216 unmutated copy. For instance, mutations within the gene that encodes CikA showed improved  
217 fitness, along with disruptions to the sigma factor encoded by *rpoD2* (40). CikA has several  
218 roles that affect the clock, including synchronization with the environment and maintenance of  
219 period; additionally, CikA is stimulated to dephosphorylate RpaA by association with the  
220 oscillator at night (13, 41). Thus, a phenotype for *cikA* mutants that is opposite to that of *sasA*  
221 mutants forms a consistent pattern.

222 From our previous understanding of the system we would predict that, in a *kaiA* null, SasA  
223 kinase would still be activated by KaiC, albeit to a lesser degree than when KaiC  
224 phosphorylation levels have been elevated by KaiA. However, CikA phosphatase would not be  
225 activated: CikA binds not to KaiC, but to a ring of KaiB that engages hyperphosphorylated KaiC,  
226 a state that is not achieved in the absence of KaiA. Therefore, we would expect that RpaA  
227 would be constitutively phosphorylated in a *kaiA* null mutant and that the cell would be fixed in  
228 the night-time program, where it would be insensitive to LDC. We further investigated the *kaiA*-  
229 mutant phenotype under LDC to test the validity of the RB-TnSeq results.

230 **Growth attenuation and rescue of a *kaiA* mutant.** The strong negative scores of bar codes  
231 for *kaiA* insertion mutants pointed to a severe growth defect in LDC. In order to vet this finding  
232 we tested the phenotype of an insertional knockout of the *kaiA* gene (*kaiA<sup>ins</sup>*), similar to the  
233 strains in the RB-TnSeq library. Assays in CLC vs LDC verified the LDC-specific defect in the  
234 mutant (**Fig. 4A**). Because neither the *kaiABC* nor *kaiC* deletion mutant has an LDC defect in  
235 pure culture, the LDC phenotype seemed to be specific for situations in which KaiC and KaiB  
236 are present without KaiA. The *kaiA* coding region has a known negative element located within

237 its C-terminal coding region that negatively regulates expression of the downstream *kaiBC*  
238 operon (42, 43) (*kaiA<sup>ins</sup>*), keeping KaiBC levels low. We reasoned that the loss of KaiA would be  
239 exacerbated if expression of KaiBC increased. To test this hypothesis, we measured the growth  
240 characteristics of a *kaiA* mutant in which the coding region of *kaiA*, including the negative  
241 element, has been removed and replaced with a drug marker (*kaiA<sup>del</sup>*) (39). This strain, which is  
242 known to have normal or slightly elevated levels of KaiB and KaiC, exhibited even more  
243 dramatic sensitivity to LDC and supported the hypothesis that an unbalanced clock output signal  
244 underlies the LDC sensitivity in the *kaiA* mutant.

245 Knowing that *rpaA*-null mutants, which cannot activate the OPPP genes, have similarly severe  
246 LDC phenotypes, we hypothesized that the *kaiA*-less strains have insufficient phosphorylation of  
247 RpaA to turn on those genes. We reasoned that additionally interrupting the *cikA* gene, whose  
248 product dephosphorylates RpaA in a clock-dependent manner, would help to conserve RpaA  
249 phosphorylation in the *kaiA<sup>del</sup>* strain and increase LDC fitness. Indeed, mutations that disrupt  
250 *cikA* were identified from the population screen as enhancing fitness (**Fig. 2B**), a finding we  
251 confirmed in a head-to-head competitive growth assay in a mixed culture with WT (**Fig. 4B**).  
252 Complementation of this double mutant with a *cikA<sup>WT</sup>* gene, or the *kaiA<sup>del</sup>* strain with *kaiA<sup>WT</sup>*  
253 gene, expressed from a neutral site in the genome, resulted in a reversal of the respective  
254 phenotypes (**SI Appendix, Fig. S1**). The LDC growth defects in *kaiA<sup>del</sup>* and improvement of the  
255 *kaiA<sup>del</sup>cikA* strain were reproducible when grown in liquid cultures in the same photobioreactors  
256 used to grow the library for the LDC screen (**Fig. 4C**). These results are consistent with a model  
257 in which, in the absence of KaiA, CikA is constitutively activated as a phosphatase to  
258 dephosphorylate RpaA.

259 **Arrhythmic and low *kaiBC* expression correlates with LDC phenotype.** Hallmarks of RpaA  
260 deficiency or dephosphorylation are low and arrhythmic expression from the *kaiBC* locus under  
261 CLC, as visualized using a luciferase-based reporter ( $P_{kaiBC}::luc$ ) (12). We used this assay to  
262 determine whether the severity of defect in LDC growth in mutants correlates with level of  
263 expression from this promoter as a proxy for RpaA phosphorylation levels. Consistent with the  
264 hypothesis, the *kaiA<sup>ins</sup>* mutant has low constitutive levels of luciferase activity, tracking near the  
265 troughs of WT circadian expression, the *kaiA* deletion mutant has almost undetectable  
266 expression, and the constitutive expression from the *kaiABC<sup>del</sup>* strain tracks near peak WT  
267 levels (**Fig. 5**). Moreover, the *kaiA<sup>del</sup>cikA* strain shows expression levels much higher than the  
268 *kaiA<sup>del</sup>* strain, approaching those observed in the *kaiABC<sup>del</sup>* mutant and around the midline of  
269 WT oscillation. Intermediate levels of growth in LDC between the *kaiA<sup>del</sup>* and *kaiA<sup>del</sup>cikA* strains  
270 were observed when a *cikA* variant (C644R) that is predicted to have reduced KaiB binding, and  
271 thus less phosphatase activation, was expressed in *trans* in the *kaiA<sup>del</sup>cikA* strain (11). Growth  
272 of this strain also displayed intermediate LDC sensitivity (**Fig. 4A and SI Appendix, Fig. S1**).  
273 These data support a correlation between expression from the  $P_{kaiBC}::luc$  reporter strain, likely  
274 reflecting RpaA phosphorylation levels, and growth in LDC.

275 **Low RpaA phosphorylation in *kaiA*-null cells as the cause of decreased fitness.** We next  
276 directly assayed the RpaA phosphorylation levels in this group of mutants by using immunoblots  
277 and Phos-tag reagent to separate phosphorylated (P-RpaA) from unphosphorylated RpaA. As  
278 predicted, P-RpaA was low in the *kaiA<sup>ins</sup>* mutant and almost undetectable in the *kaiA<sup>del</sup>* strain  
279 (**Fig. 6A**). Adding an ectopic WT *kaiA* allele, or disrupting *cikA*, in the *kaiA<sup>del</sup>* mutant restored  
280 RpaA phosphorylation. Thus, even though adequate KaiC is present to engage SasA to  
281 phosphorylate RpaA (**Fig. 6B**), the absence of KaiA is sufficient to suppress the accumulation of  
282 phosphorylated RpaA. These results support the conclusion that the rescue of the *kaiA* growth  
283 defect by disrupting *cikA* is due to the elimination of CikA phosphatase activity.

284 Because the model suggests that turning on RpaA-dependent genes at dusk is critical for  
285 survival in LDC, we measured P-RpaA specifically at light-to-dark and dark-to-light transitions in

286 *kaiA<sup>del</sup>* and *kaiA<sup>del</sup>cikA* over three diel cycles. WT has a marked pattern of high P-RpaA at dusk  
287 and low levels at dawn (**Fig. 6C**). The *kaiA<sup>del</sup>* strain had almost undetectable levels of P-RpaA,  
288 visible only when the overall RpaA signal was very high. The P-RpaA phosphorylation status in  
289 the *kaiA<sup>del</sup>cikA* was restored but did not show diel variations, consistent with the arrhythmicity of  
290 *kaiA* mutants.

291 Other physiological similarities between the *kaiA*-null and *rpaA*-null strains exist. An *rpaA*  
292 mutant accumulates excessive reactive oxygen species (ROS) during the day that it is unable to  
293 alleviate during the night (15). Metabolomic analysis points towards a deficiency in reductant,  
294 needed to power detoxification reactions for photosynthetically-generated ROS, due to lack of  
295 NADPH production in the dark when OPPP genes are not activated. Likewise, levels of ROS in  
296 *kaiA<sup>del</sup>* were significantly higher at night than in WT and *kaiA<sup>del</sup>cikA* (**Fig. 6D**).

297 **Molecular basis of CikA engagement in the absence of KaiA.** The proposal that the LDC  
298 fitness defects in *kaiA* mutants result from excessive CikA phosphatase activity was derived  
299 from genetic data related to known LDC-defective mutants. However, previous studies  
300 regarding KaiA activities had not predicted this outcome. Very recent structural data, enabled  
301 through the assembly of KaiABC and KaiB-CikA complexes, pointed to a likely mechanism: loss  
302 of competition for a binding site on KaiB that KaiA and CikA share (11). Although this hypothesis  
303 was appealing, the current model of progression of the Kai oscillator cycle could not predict this  
304 outcome. KaiA and CikA bind to a ring of KaiB that forms after KaiC has become  
305 phosphorylated at Serine 431 and Threonine 432 (44). Maturation to this state induces  
306 intramolecular changes in KaiC that expose the KaiB binding site. In the absence of KaiA, KaiC  
307 autophosphorylation is extremely abated as measured both *in vivo* (45) and *in vitro* (1-10%, **SI**  
308 **Appendix, Fig. S5C**), so how can KaiB bind?

309 We used fluorescence anisotropy to directly determine whether KaiB can engage with KaiC in  
310 the absence of KaiA, when KaiC is mainly unphosphorylated (**Fig. 7** and **SI Appendix, Fig. S5**).  
311 If KaiC-KaiB binding can occur, it could support binding of CikA – expected to be a necessary  
312 event for CikA phosphatase activation. This method measures the magnitude of polarization of  
313 fluorescence from KaiB tagged with a fluorophore (6-iodoacetamidofluorescein), which  
314 increases when KaiB becomes part of a larger complex. KaiC phosphomimetic mutants were  
315 used to quantify interaction of KaiB with each of the phosphostates of KaiC. Initially, we  
316 hypothesized that the KaiB binding site might become exposed on KaiC in the absence of  
317 phosphorylation when cells enter the dark and the ATP/ADP ratio is altered (46). For this  
318 reason, experiments were performed at different ATP/ADP ratios. As a control, we confirmed  
319 that no significant association of KaiB with CikA occurs in the absence of KaiC (**Fig. 7A**).  
320 However, KaiB is able to associate with hypophosphorylated WT KaiC approximately as well as  
321 with the phosphomimetic, KaiC-EA, which mimics a form of KaiC (KaiC-pST, where S431 is  
322 phosphorylated) that binds KaiB, which then forms a new ring on the N-terminal face of KaiC  
323 that captures KaiA and CikA. This binding was similar in both 1 mM ATP (**Fig. 7B**) and 0.5 mM  
324 ATP+0.5 mM ADP conditions (**Fig. 7A**), suggesting that darkness (associated with decreased  
325 ATP/ADP *in vivo*) is not required to enable KaiB binding to KaiC. Moreover, CikA associated  
326 with KaiBC under both conditions. Association of KaiB was minimal with KaiC-AE, a mimic of  
327 the daytime state (KaiC-SpT, where T432 is phosphorylated) when KaiA is usually well-  
328 associated with the A-loops of KaiC in an interaction that does not require KaiB. However, the  
329 presence of CikA enhanced the binding of KaiB to KaiC-AE, presumably due to cooperative  
330 formation of a KaiC-KaiB-CikA complex. For the WT KaiC experiments in **Fig. 7**, 6IAF-KaiB  
331 (0.05  $\mu$ M) is most likely binding to the small percentage of the KaiC population that remains  
332 phosphorylated (1-10% = 0.04-0.4  $\mu$ M). *In vivo*, it is likely that in the absence of KaiA, KaiB  
333 likewise binds selectively to a small fraction of the KaiC pool that is phosphorylated.

334 These data generally match the patterns expected for the current oscillator model; however,  
335 they also demonstrate that the KaiC-KaiB-CikA complex can form in the absence of KaiA, when  
336 the KaiC pool is mostly hypophosphorylated, and that the ATP ratio (mimicking day and night)  
337 has little effect on this association. Furthermore, they support the competitive binding of KaiA  
338 and CikA to the KaiB ring. These observations are consistent with the proposal that the low  
339 survival rate of *kaiA-null* mutants is due to over-stimulation of CikA phosphatase activity,  
340 stripping the cell of P-RpaA and disabling expression of the critical night-time reductant-  
341 producing OPPP.

## 342 Discussion

343 Recent research and interest in growth of cyanobacteria in LDC conditions (15, 16, 20, 22, 47–  
344 49) provides a rich dataset to inform engineering strategies, to model metabolic flux predictions,  
345 and to elucidate the intersection of the clock and cell physiology. While previous studies have  
346 identified a handful of genes important for growth in LDC, the conditional defect of these  
347 mutants was determined from targeted studies that left large unknowns in the pathways  
348 important for LDC. This study used an unbiased quantitative method to comprehensively query  
349 the *S. elongatus* genome for the full set of genes that are specifically necessary to survive the  
350 night. This approach eliminated the requirement to test individual mutants for a scorable  
351 phenotype under diel conditions and allowed for the discovery of genes that would not be  
352 predicted to have such a phenotype. In addition to identifying genes of pathways previously  
353 unknown to be involved in LDC, this screen also strongly reinforced two emerging stories from  
354 recent research: the breakdown of glycogen and flux through the OPPP, the major source of  
355 reductant under non-photosynthetic conditions, is essential (15, 16); and, the role of the clock is  
356 repressive, rather than enabling (12), as its complete elimination has little consequence in LDC,  
357 but its constitutive output signaling is harmful under these conditions because of its negative  
358 effect on the OPPP genes.

359 A boon of the Rb-TnSeq data is in how it reveals non-intuitive insights into the regulatory  
360 measures cells need for growth in specific conditions. One such discovery is that a *kaiA* mutant  
361 is severely LDC sensitive. Investigation of the mechanism that underlies this phenotype led to  
362 increased understanding of the function of the Kai oscillator, a nanomachine whose structural  
363 interactions have been revealed with an unusual degree of clarity (11, 50). KaiA is  
364 conventionally thought to have a specific daytime role in stimulating KaiC autophosphorylation –  
365 an activity that promotes SasA stimulation and brings about the conformational change in KaiC  
366 that enables KaiB engagement (**Fig. 8A**). This latter step ushers in the KaiC dephosphorylation  
367 phase, during which KaiA is a passive, inactive player. Results from this study provide a new  
368 perspective of KaiA in its KaiB-bound form as regulating the night-time clock output by its  
369 competition with CikA for KaiB-binding (**Fig. 8B**). A cell without KaiA leaves the major  
370 transcription factor RpaA hypophosphorylated for two reasons. First, without KaiC undergoing  
371 its daytime phosphorylation cycle, SasA engagement with the oscillator is diminished, reducing  
372 its kinase activity acting on RpaA. Secondly, without KaiA present as a competitor, the  
373 opportunities for CikA binding on KaiB-KaiC complexes increase, leading to hyperactive  
374 phosphatase activity and ultimately eliminating any chance for phosphorylated RpaA to  
375 accumulate. The result is a severe decrease in fitness in LDC. However, cells without KaiA and  
376 CikA (and even without KaiABC) have ample P-RpaA, indicating that other pathways contribute  
377 to the phosphorylation of RpaA. This fact emphasizes the counterintuitive point that activation of  
378 CikA phosphatase in the night-time complex, rather than activation of SasA kinase, is the key  
379 signaling state of the cyanobacterial clock (12).

380 The screen revealed expected mutants as well. Although a *kaiC* mutant does not have a notable  
381 LDC defect in pure culture, it is known to do poorly in LDC when grown in a population with  
382 other cells that have a functioning circadian rhythm, as is the case in the pooled growth scenario



383 used here, illustrating soft selection for circadian rhythms in cyanobacteria (1). As expected,  
384 *kaiC* was deficient under LDC, but not as severely as many other mutants. One of the most  
385 severely LDC-defective mutants we know of is *rpaA*, which dies within a few hours of dark  
386 exposure and requires special handling in the lab. Strains with disruptions in *rpaA* did score as  
387 negative, but only to a moderate degree (-0.7). This discrepancy between severe known  
388 phenotype and moderate score can be attributed to the fact that *rpaA* mutants were also less fit  
389 than the population in CLC, decreasing its magnitude of relative fitness in LDC, similar to the  
390 situation for mutants defective in glycogen anabolic processes.

391 Importantly, the screen also identified an equivalent list of genes whose loss improves growth in  
392 LDC. Although not the target of the current study, these genes have great potential for providing  
393 new insights into *S. elongatus* diurnal physiology and perhaps improved genetic backgrounds  
394 for metabolic engineering. In contrast to many of the mutants that negatively affect LDC growth,  
395 the list of top positive mutants includes many genes with less transparent roles in LDC  
396 conditions, including some that carry no functional annotation. The phenotype may be  
397 attributable to a specific pathway or may result from the additive effects of many unrelated  
398 genes whose expression is altered in a regulon indirectly. Some mutants may outcompete  
399 others in the population because they have alleviated photochemical intermediate buildup or  
400 lessened the uptake of harmful metabolites in the medium. The scant information available  
401 regarding these pathways makes it difficult to predict why their value would be different in CLC  
402 vs. LDC.

403 In summary, this study has improved our understanding of the mechanism of core oscillator  
404 protein interactions and generated a comprehensive map of genetic pathways needed for  
405 survival in LDC in *S. elongatus*. We have shown that KaiA, originally thought to only regulate  
406 KaiC autophosphorylation, also modulates CikA-mediated clock output. More broadly, the use of  
407 RB-TnSeq on a dense transposon library in this study has identified the genes in the genome  
408 necessary for growth in alternating light-dark conditions, established a firm connection between  
409 circadian clock regulation and the metabolic pathways critical for fitness in more natural  
410 environments, and contributed to a more complete picture of the finely balanced mechanisms  
411 that underlie circadian clock output.

412

## 413 **Materials and Methods**

414 **Bacterial strains and culture conditions.** All cultures were constructed using WT *S. elongatus*  
415 PCC 7942 stored in our laboratory as AMC06. Cultures (**Table S1**) were grown at 30 °C using  
416 either BG-11 liquid or solid medium with antibiotics as needed for selection at standard  
417 concentrations: 20 µg/mL for kanamycin (Km) and gentamicin (Gm), 22 µg/mL for  
418 chloramphenicol (Cm), and 10 µg/mL each for spectinomycin and streptomycin (SpSm) (51).  
419 Liquid cultures were either cultivated in 100 mL volumes in 250 mL flasks shaken at ~150 rpm  
420 on an orbital shaker or in 400 mL volume in top-lit bioreactors (Phenometrics Inc. ePBR  
421 photobioreactors version 1.1) mixed via filtered ambient-air bubble agitation with a flow rate of  
422 0.1 mL per min at 30 °C. Viable cell plating for LDC-sensitivity testing and quantification of  
423 cellular ROS via 2',7'-dichlorodihydrofluorescein diacetate (H<sub>2</sub>DCFDA) were performed as  
424 previously described (15). Spot-plate growth was quantified by converting the plate image to 8-  
425 bit and performing densitometric analyses using National Institutes of Health ImageJ software  
426 (52). Transformation was performed following standard protocols (53). Strains were checked  
427 periodically for contamination using BG-11 Omni plates (BG-11 supplemented with 0.04%  
428 glucose and 5% LB) (53). Verification of the disruption of the *kaiA* gene in mutants was  
429 performed by PCR and is shown in **SI Appendix, Fig. S1**. For immunoblotting experiments and

430 ROS measurements cultures were grown in flasks. Samples for protein were taken after 3 light-  
431 dark cycles at specified time points immediately before the lights turned on and turned off.

432 **One-on-one competition experiments.** The relative fitness of *cikA* null and *cikA*+ strains was  
433 assessed in growth competition experiments that leveraged different antibiotic resistance  
434 markers in the strains. The *cikA* mutant carries a Gm-resistance marker inserted in the *cikA*  
435 locus. AMC06 was transformed with pAM1579 to generate a Km-resistant strain that carries the  
436 drug cassette in neutral site II (designated as “WT-Km<sup>R</sup>” for this experiment). The axenic  
437 cultures were grown to OD<sub>750</sub> ~ 0.4, washed three times with BG-11 via centrifugation at 4,696  
438 G for 10 min to remove antibiotics, and diluted with BG-11 to an OD<sub>750</sub> of 0.015. Cultures were  
439 then mixed in a 1:1 ratio and grown without antibiotics for 8 days under ~100 μmol photos· m<sup>2</sup>  
440 · s<sup>-1</sup> light. To assay survival of each genotype at 0, 3, and 8 days, mixed cultures were diluted  
441 using a 1:10 dilution series and plated in 20 μL spots in duplicate onto ~2 mL of BG-11 agar  
442 with either Gm or Km poured in the wells of a 24-well microplate. CFU's of each strain were  
443 calculated from the dilution series across the two antibiotic regimes and were used to determine  
444 the percentage of each strain in the mixture population over time. To ensure that the expression  
445 of the antibiotic markers did not influence fitness, WT cultures that carried each drug-resistance  
446 marker (Km in neutral site II via plasmid pAM1579 or Gm in neutral site III via plasmid  
447 pAM5328) were grown together and assayed, and displayed no significant differences (**SI**  
448 **Appendix, Fig. S2**).

449 **Rb-Tnseq Assay.** Samples of the library archived at -80 C were quickly thawed in a 37 C water  
450 bath for 2 min and then divided into three flasks of 100 mL BG-11 with Km, and incubated at 30  
451 °C in 30 μmol photos· m<sup>2</sup>· s<sup>-1</sup> light for 1 day without shaking. The library culture was then  
452 moved to 70 μmol photos· m<sup>2</sup>· s<sup>-1</sup> light on an orbital shaker till OD<sub>750</sub> reached ~0.3. The  
453 cultures were then combined, diluted to starting density of OD<sub>750</sub> 0.025, and 4 replicates of 15  
454 mL were spun down at 4,696 g and frozen at -80 °C as Time 0 samples to determine population  
455 baseline. After transferring to bioreactors, CLC bioreactors were set for continuous light at 500  
456 μmol photos· m<sup>2</sup>· s<sup>-1</sup> and LDC bioreactors were set to a square-wave cycle consisting of 12 h  
457 light - 12 h dark. Bioreactors were set to run in turbidostat mode maintaining the density at  
458 OD<sub>750</sub> = 0.1. Bioreactors were sampled after approximately 6 generations: the CLC reactors  
459 after 3 days (three 24-h light periods) and LDC reactors after 4 days (four 12-h light-12-h dark  
460 light dark periods). Two of the three biological replicates for each condition were performed  
461 concurrently (using 4 bioreactors) while a third was performed later using the same procedure  
462 and conditions.

463 **Bioluminescence monitoring.** Flask-grown batch cultures that reached a density of OD<sub>750</sub> =  
464 0.3-0.4 were diluted as needed to OD<sub>750</sub> of 0.3 and 20 μL of each culture was placed on a pad  
465 of BG-11 agar containing 10 μL of 100 mM firefly luciferin, in a well of a 96-well dish. Plates  
466 were covered with clear tape to prevent drying and holes were poked using a sterile needle to  
467 allow air transfer. Cultures were synchronized by incubating the plate under permissive LDC  
468 conditions (0 and 30 μmol photos· m<sup>2</sup>· s<sup>-1</sup> light) for 3 days, and then returned to constant light  
469 (LL) conditions for bioluminescence sampling by a Packard TopCount luminometer  
470 (PerkinElmer Life Sciences). Bioluminescence of P<sub>kaiBC</sub>::*luc* firefly luciferase fusion reporter was  
471 monitored at 30 °C under CLC as described previously (54). Data were analyzed with the  
472 Biological Rhythms Analysis Software System (<http://millar.bio.ed.ac.uk/pebrown/brass/brasspage.htm>) import and analysis program using Microsoft Excel. Results shown are  
473 the average of four biological replicate wells located in the innermost section of the plate, where  
474 drying is minimal.  
475

476 **Protein sample preparation and gel electrophoresis, and Phos-tag acrylamide gels.**  
477 Protein was isolated from cells and diluted to final loading concentration of 5 µg/well for RpaA  
478 analysis and 10 µg/well for KaiC analysis (55). SDS/PAGE was performed according to  
479 standard methods with the following exceptions. Phosphorylation of RpaA was detected using  
480 10% SDS-polyacrylamide gels supplemented with Phos-tag ligand (Wako Chemicals USA) at a  
481 final concentration of 25 µM and manganese chloride at a final concentration of 50 µM. Gels  
482 were incubated once for 10 min in transfer buffer supplemented with 100 mM EDTA, followed by  
483 a 10-min incubation in transfer buffer without EDTA before standard wet transfer. Protein  
484 extracts and the electrophoretic apparatus were chilled to minimize hydrolysis of heat-labile  
485 phospho-Asp. Protein extracts for use in Phos-tag gels were prepared in Tris-buffered saline,  
486 and extracts for standard SDS/PAGE were prepared in PBS. RpaA antiserum (a gift from E.  
487 O'Shea, Harvard University, Cambridge, MA) was used at a dilution of 1:2,000 and secondary  
488 antibody (goat anti-rabbit IgG, Calbiochem Cat # 401315) at 1:5000. KaiC immunoblotting was  
489 performed similarly using KaiC antiserum diluted to 1:2000 and secondary antibody diluted to  
490 1:10,000 (Horseradish Peroxidase-labeled goat anti-chicken IgY, Aves Labs, Cat # H-1004)  
491 (56). Densitometric analyses were performed using National Institutes of Health ImageJ  
492 software (52) (**SI Appendix, Fig. S3, Dataset S3**). Samples were immediately stored at -80 °C,  
493 thawed once, and always kept on ice.

494 **Fitness calculations.** Of the 2,723 genes comprising the genome of *S. elongatus* 718 are  
495 essential, and mutants in the essential genes are not present in the library (24). To estimate the  
496 fitness effects of gene disruptions in LDC relative to CLC, we developed an analysis pipeline of  
497 curating the data from the 2,005 nonessential genes, normalizing it, and then analyzing it using  
498 linear models (**Dataset S1**). We first counted the number of reads for each sample to use as a  
499 normalizing factor between samples. Bar codes are dispersed across the genome, and we  
500 removed any bar code falling outside of a gene (24,868 bar codes out of 154,949 total bar  
501 codes) or within a gene but not within the middle 80% (27,763/154,949). Based on the bar  
502 codes remaining, we removed any gene not represented by at least three bar codes in different  
503 positions (114 genes out of 2,075 total). This filtering left us with 102,136 bar codes distributed  
504 across 1,961 genes.

505 For each bar code in each sample we added a pseudocount of one to the number of reads,  
506 divided by the total number of reads for the sample as calculated before, and took the log-2  
507 transformation of this sample-normalized number of reads. The experiment involved two  
508 different starting pools of strains (called T0), each of which was divided into CLC and LDC  
509 samples. To account for different starting percentages of each bar code within the T0 pools, we  
510 averaged the log-2 transformed values for a bar code across the four replicate T0 samples for  
511 each pool then subtracted these average starting bar-code values from the CLC and LDC  
512 values in the respective pools. We also removed any gene without at least 15 T0 reads (across  
513 the four replicates and before adding the pseudocount) in each pool (89/1,961), leaving 1,872  
514 genes and 101,258 bar codes.

515 For each gene, we used maximum likelihood to fit a pair of nested linear mixed effects models  
516 to the sample- and read-normalized log-2 transformed counts:

517

$$518 \quad (1) \ y_{i,j,k} = \mu_g + C_j + B_i + \varepsilon_{i,j,k}; \ B_i \sim \text{iid } N(0, \zeta_g^2); \ \varepsilon_{i,j,k} \sim \text{iid } N(0, \sigma_g^2)$$

519

$$520 \quad (2) \ y_{i,j,k} = \mu_g + B_i + \varepsilon_{i,j,k}; \ B_i \sim \text{iid } N(0, \zeta_g^2); \ \varepsilon_{i,j,k} \sim \text{iid } N(0, \sigma_g^2)$$

521

522 where  $y_{i,j,k}$  is the normalized log-2 value for bar code  $i$  in gene  $g$  in condition  $j$  for sample  $k$ ,  $\mu_g$  is  
523 the average value for the gene,  $C_j$  is the fixed effect of condition  $j$ ,  $B_i$  is a random effect for bar  
524 code  $i$ , and  $\varepsilon_{i,j,k}$  is the residual. We identified genes with significant fitness differences between  
525 conditions by comparing the difference in the  $-2 \cdot \log$  likelihoods of the models to a chi-square  
526 distribution with one degree of freedom, estimating a p-value, accounting for multiple testing by  
527 the false-discovery rate method of Benjamini and Hochberg (57), and selecting those gene with  
528 adjusted p-values less than 0.01. We took the contrast  $C_{LDC} - C_{CLC}$  to be the estimated LDC-  
529 specific fitness effect of knocking out the gene (**Dataset S2**).

530 Results obtained across biological replicates and across similar screens performed in either  
531 batch cultures grown in 250 mL Erlenmeyer shake flasks and on solid agar on Petri plates were  
532 consistent (**SI Appendix, Fig. S4, Dataset S4**). Mutants that had estimated fitness scores  
533 below a confidence threshold (associated FDR adjusted p-value  $< 0.01$ ) (**Dataset S2**) were not  
534 considered. Mutants with gene disruptions that had an LDC fitness score  $\geq 1.0$  or  $\leq -1.0$  with a  
535 false discovery rate  $\leq 1\%$  were classified having strong fitness phenotype specific to growth in  
536 LDC, and those with a fitness score of  $< 1.0$  but  $\geq 0.5$  and  $> -1.0$  but  $\leq -0.5$  were classified as  
537 causing a moderate fitness phenotype. Fitness scores  $< 0.5$  and  $> -0.5$  were categorized as  
538 negligent/minor, i.e., little change in abundance over the course of the experiment in LDC vs.  
539 CLC.

540 **Fluorescence Spectroscopy.** To monitor the formation of the CikA activating complex,  
541 fluorescence anisotropy measurements were performed at 30 °C on an ISS PC1  
542 spectrofluorometer equipped with a three-cuvette sample compartment, at excitation and  
543 emission wavelengths of 492 nm and 530 nm, respectively, for samples including 6-  
544 iodoacetamidofluorescein (6-IAF) labeled KaiB-FLAG-K251C alone (0.05  $\mu\text{M}$ ), and its mixtures  
545 with KaiC (4  $\mu\text{M}$ ) or FLAG-CikA (4  $\mu\text{M}$ ) or KaiC (4  $\mu\text{M}$ ) + FLAG-CikA (4  $\mu\text{M}$ ). Each sample (400  
546  $\mu\text{L}$ ) was either in an ATP buffer [20 mM Tris, 150 mM NaCl, 5 mM  $\text{MgCl}_2$ , 1 mM ATP, 0.5 mM  
547 EDTA, 0.25 mM TCEP (tris(2-carboxyethyl)phosphine), pH 8.0] or in ATP/ADP buffer [20 mM  
548 Tris, 150 mM NaCl, 5 mM  $\text{MgCl}_2$ , 0.5 mM ATP, 0.5 mM ADP, 0.5 mM EDTA, 0.25 mM TCEP,  
549 pH 8.0]. TCEP was introduced from the FLAG-CikA stock [20 mM Tris, 150 mM NaCl, 5 mM  
550 TCEP, pH 8.0]. KaiB stock was in the buffer [20 mM Tris, 150 mM NaCl, pH 8.0] and KaiC stock  
551 in the buffer [20 mM Tris, 150 mM NaCl, 5 mM  $\text{MgCl}_2$ , 1 mM ATP, 0.5 mM EDTA, pH 8.0].

552 The KaiC samples included freshly dephosphorylated WT KaiC, and KaiC phosphomimetics  
553 KaiC-AE and KaiC-EA. To prepare the freshly dephosphorylated KaiC, WT KaiC at 20  $\mu\text{M}$  in the  
554 buffer [20 mM Tris, 150 mM NaCl, 5 mM  $\text{MgCl}_2$ , 1 mM ATP, 0.5 mM EDTA, pH 8.0] was  
555 incubated at 30 °C for 24 hours before the fluorescence binding assays. SDS-PAGE analysis  
556 was performed to determine KaiC and CikA stability and KaiC phosphorylation levels (**SI**  
557 **Appendix, Fig. S5, Dataset S5**).

558

## 559 Acknowledgments

560 We thank L. Lowe and J. Tan for technical assistance. This work was supported by research  
561 grants (R35GM118290 to SSG; R01GM107521 to AL) and training grants (T32GM007240 to  
562 BER and SD) from the National Institutes of Health and the National Science Foundation  
563 (MCB1517482 to SAR).

564



## 565 **References**

- 566 1. Ouyang Y, Andersson CR, Kondo T, Golden SS, Johnson CH (1998) Resonating circadian  
567 clocks enhance fitness in cyanobacteria. *Proc Natl Acad Sci U S A* 95(15):8660–8664.
- 568 2. Woelfle MA, Ouyang Y, Phanvijhitsiri K, Johnson CH (2004) The adaptive value of  
569 circadian clocks: an experimental assessment in cyanobacteria. *Curr Biol* 14(16):1481–  
570 1486.
- 571 3. Lambert G, Chew J, Rust MJ (2016) Costs of Clock-Environment Misalignment in Individual  
572 Cyanobacterial Cells. *Biophys J* 111(4):883–891.
- 573 4. Yerushalmi S, Yakir E, Green RM (2011) Circadian clocks and adaptation in *Arabidopsis*.  
574 *Mol Ecol* 20(6):1155–1165.
- 575 5. Dodd AN, et al. (2005) Plant circadian clocks increase photosynthesis, growth, survival,  
576 and competitive advantage. *Science* 309(5734):630–633.
- 577 6. Morris CJ, Yang JN, Scheer FAJL (2012) The impact of the circadian timing system on  
578 cardiovascular and metabolic function. *Prog Brain Res* 199:337–358.
- 579 7. Kelleher FC, Rao A, Maguire A (2014) Circadian molecular clocks and cancer. *Cancer Lett*  
580 342(1):9–18.
- 581 8. Kim JH, Duffy JF (2018) Circadian Rhythm Sleep-Wake Disorders in Older Adults. *Sleep*  
582 *Med Clin* 13(1):39–50.
- 583 9. Chaix A, Zarrinpar A, Panda S (2016) The circadian coordination of cell biology. *J Cell Biol*  
584 215(1):15–25.
- 585 10. Nakajima M, et al. (2005) Reconstitution of circadian oscillation of cyanobacterial KaiC  
586 phosphorylation in vitro. *Science* 308(5720):414–415.
- 587 11. Tseng R, et al. (2017) Structural basis of the day-night transition in a bacterial circadian  
588 clock. *Science* 355(6330):1174–1180.
- 589 12. Paddock ML, Boyd JS, Adin DM, Golden SS (2013) Active output state of the  
590 *Synechococcus* Kai circadian oscillator. *Proc Natl Acad Sci U S A* 110(40):E3849–57.
- 591 13. Gutu A, O’Shea EK (2013) Two antagonistic clock-regulated histidine kinases time the  
592 activation of circadian gene expression. *Mol Cell* 50(2):288–294.
- 593 14. Markson JS, Piechura JR, Puszynska AM, O’Shea EK (2013) Circadian control of global  
594 gene expression by the cyanobacterial master regulator RpaA. *Cell* 155(6):1396–1408.
- 595 15. Diamond S, et al. (2017) Redox crisis underlies conditional light-dark lethality in  
596 cyanobacterial mutants that lack the circadian regulator, RpaA. *Proc Natl Acad Sci U S A*  
597 114(4):E580–E589.
- 598 16. Puszynska AM, O’Shea EK (2017) Switching of metabolic programs in response to light  
599 availability is an essential function of the cyanobacterial circadian output pathway. *Elife* 6.  
600 doi:10.7554/eLife.23210.

- 601 17. Swan JA, Golden S, LiWang A, Partch CL (2018) Structure, function, and mechanism of the  
602 core circadian clock in cyanobacteria. *J Biol Chem*. doi:10.1074/jbc.TM117.001433.
- 603 18. Iwasaki H, et al. (2000) A *kaiC*-interacting sensory histidine kinase, SasA, necessary to  
604 sustain robust circadian oscillation in cyanobacteria. *Cell* 101(2):223–233.
- 605 19. Boyd JS, Bordowitz JR, Bree AC, Golden SS (2013) An allele of the *crm* gene blocks  
606 cyanobacterial circadian rhythms. *Proc Natl Acad Sci U S A* 110(34):13950–13955.
- 607 20. Diamond S, Jun D, Rubin BE, Golden SS (2015) The circadian oscillator in *Synechococcus*  
608 *elongatus* controls metabolite partitioning during diurnal growth. *Proc Natl Acad Sci U S A*  
609 112(15):E1916–25.
- 610 21. Gründel M, Scheunemann R, Lockau W, Zilliges Y (2012) Impaired glycogen synthesis  
611 causes metabolic overflow reactions and affects stress responses in the cyanobacterium  
612 *Synechocystis* sp. PCC 6803. *Microbiology* 158(Pt 12):3032–3043.
- 613 22. Puszynska AM, O’Shea EK (2017) ppGpp Controls Global Gene Expression in Light and in  
614 Darkness in *S. elongatus*. *Cell Rep* 21(11):3155–3165.
- 615 23. Hood RD, Higgins SA, Flamholz A, Nichols RJ, Savage DF (2016) The stringent response  
616 regulates adaptation to darkness in the cyanobacterium *Synechococcus elongatus*. *Proc*  
617 *Natl Acad Sci U S A* 113(33):E4867–76.
- 618 24. Rubin BE, et al. (2015) The essential gene set of a photosynthetic organism. *Proc Natl*  
619 *Acad Sci U S A* 112(48):E6634–43.
- 620 25. Broddrick JT, et al. (2016) Unique attributes of cyanobacterial metabolism revealed by  
621 improved genome-scale metabolic modeling and essential gene analysis. *Proc Natl Acad*  
622 *Sci U S A* 113(51):E8344–E8353.
- 623 26. Wetmore KM, et al. (2015) Rapid quantification of mutant fitness in diverse bacteria by  
624 sequencing randomly bar-coded transposons. *MBio* 6(3):e00306–15.
- 625 27. Vijayan V, Zuzow R, O’Shea EK (2009) Oscillations in supercoiling drive circadian gene  
626 expression in cyanobacteria. *Proc Natl Acad Sci U S A* 106(52):22564–22568.
- 627 28. Miao X, Wu Q, Wu G, Zhao N (2003) Changes in photosynthesis and pigmentation in an  
628 *agp* deletion mutant of the cyanobacterium *Synechocystis* sp. *Biotechnol Lett* 25(5):391–  
629 396.
- 630 29. Li X, Shen CR, Liao JC (2014) Isobutanol production as an alternative metabolic sink to  
631 rescue the growth deficiency of the glycogen mutant of *Synechococcus elongatus* PCC  
632 7942. *Photosynth Res* 120(3):301–310.
- 633 30. Porankiewicz J, Clarke AK (1997) Induction of the heat shock protein ClpB affects cold  
634 acclimation in the cyanobacterium *Synechococcus* sp. strain PCC 7942. *J Bacteriol*  
635 179(16):5111–5117.
- 636 31. Gill RT, et al. (2002) Genome-wide dynamic transcriptional profiling of the light-to-dark  
637 transition in *Synechocystis* sp. strain PCC 6803. *J Bacteriol* 184(13):3671–3681.
- 638 32. Hagemann M, Vinnemeier J, Oberpichler I, Boldt R, Bauwe H (2005) The glycine

- 639 decarboxylase complex is not essential for the cyanobacterium *Synechocystis* sp. strain  
640 PCC 6803. *Plant Biol* 7(1):15–22.
- 641 33. Hackenberg C, et al. (2009) Photorespiratory 2-phosphoglycolate metabolism and  
642 photoreduction of O<sub>2</sub> cooperate in high-light acclimation of *Synechocystis* sp. strain PCC  
643 6803. *Planta* 230(4):625–637.
- 644 34. Cohen SE, Golden SS (2015) Circadian Rhythms in Cyanobacteria. *Microbiol Mol Biol Rev*  
645 79(4):373–385.
- 646 35. Ishiura M, et al. (1998) Expression of a gene cluster *kaiABC* as a circadian feedback  
647 process in cyanobacteria. *Science* 281(5382):1519–1523.
- 648 36. Nishiwaki T, et al. (2004) Role of KaiC phosphorylation in the circadian clock system of  
649 *Synechococcus elongatus* PCC 7942. *Proc Natl Acad Sci U S A* 101(38):13927–13932.
- 650 37. Xu Y, et al. (2004) Identification of key phosphorylation sites in the circadian clock protein  
651 KaiC by crystallographic and mutagenetic analyses. *Proc Natl Acad Sci U S A*  
652 101(38):13933–13938.
- 653 38. Williams SB, Vakonakis I, Golden SS, LiWang AC (2002) Structure and function from the  
654 circadian clock protein KaiA of *Synechococcus elongatus*: a potential clock input  
655 mechanism. *Proc Natl Acad Sci U S A* 99(24):15357–15362.
- 656 39. Ditty JL, Canales SR, Anderson BE, Williams SB, Golden SS (2005) Stability of the  
657 *Synechococcus elongatus* PCC 7942 circadian clock under directed anti-phase expression  
658 of the *kai* genes. *Microbiology* 151(Pt 8):2605–2613.
- 659 40. Nair U, Ditty JL, Min H, Golden SS (2002) Roles for sigma factors in global circadian  
660 regulation of the cyanobacterial genome. *J Bacteriol* 184(13):3530–3538.
- 661 41. Schmitz O, Katayama M, Williams SB, Kondo T, Golden SS (2000) CikA, a  
662 bacteriophytochrome that resets the cyanobacterial circadian clock. *Science*  
663 289(5480):765–768.
- 664 42. Chen Y, et al. (2009) A novel allele of *kaiA* shortens the circadian period and strengthens  
665 interaction of oscillator components in the cyanobacterium *Synechococcus elongatus* PCC  
666 7942. *J Bacteriol* 191(13):4392–4400.
- 667 43. Kutsuna S, Nakahira Y, Katayama M, Ishiura M, Kondo T (2005) Transcriptional regulation  
668 of the circadian clock operon *kaiBC* by upstream regions in cyanobacteria. *Mol Microbiol*  
669 57(5):1474–1484.
- 670 44. Chang Y-G, et al. (2015) Circadian rhythms. A protein fold switch joins the circadian  
671 oscillator to clock output in cyanobacteria. *Science* 349(6245):324–328.
- 672 45. Kitayama Y, Iwasaki H, Nishiwaki T, Kondo T (2003) KaiB functions as an attenuator of  
673 KaiC phosphorylation in the cyanobacterial circadian clock system. *EMBO J* 22(9):2127–  
674 2134.
- 675 46. Rust MJ, Golden SS, O’Shea EK (2011) Light-driven changes in energy metabolism directly  
676 entrain the cyanobacterial circadian oscillator. *Science* 331(6014):220–223.

- 677 47. Ito H, et al. (2009) Cyanobacterial daily life with Kai-based circadian and diurnal genome-  
678 wide transcriptional control in *Synechococcus elongatus*. *Proc Natl Acad Sci U S A*  
679 106(33):14168–14173.
- 680 48. Matson MM, Atsumi S (2017) Photomixotrophic chemical production in cyanobacteria. *Curr*  
681 *Opin Biotechnol* 50:65–71.
- 682 49. McEwen JT, Kanno M, Atsumi S (2016) 2,3 Butanediol production in an obligate  
683 photoautotrophic cyanobacterium in dark conditions via diverse sugar consumption. *Metab*  
684 *Eng* 36:28–36.
- 685 50. Snijder J, et al. (2017) Structures of the cyanobacterial circadian oscillator frozen in a fully  
686 assembled state. *Science* 355(6330):1181–1184.
- 687 51. Taton A, et al. (2014) Broad-host-range vector system for synthetic biology and  
688 biotechnology in cyanobacteria. *Nucleic Acids Res* 42(17):e136.
- 689 52. Schneider CA, Rasband WS, Eliceiri KW (2012) NIH Image to ImageJ: 25 years of image  
690 analysis. *Nat Methods* 9(7):671–675.
- 691 53. Clerico EM, Ditty JL, Golden SS (2007) Specialized techniques for site-directed  
692 mutagenesis in cyanobacteria. *Methods Mol Biol* 362:155–171.
- 693 54. Mackey SR, Golden SS, Ditty JL (2011) The itty-bitty time machine genetics of the  
694 cyanobacterial circadian clock. *Adv Genet* 74:13–53.
- 695 55. Ivleva NB, Golden SS (2007) Protein extraction, fractionation, and purification from  
696 cyanobacteria. *Methods Mol Biol* 362:365–373.
- 697 56. Dong G, et al. (2010) Elevated ATPase activity of KaiC applies a circadian checkpoint on  
698 cell division in *Synechococcus elongatus*. *Cell* 140(4):529–539.
- 699 57. Benjamini Y, Hochberg Y (1995) Controlling the False Discovery Rate: A Practical and  
700 Powerful Approach to Multiple Testing. *J R Stat Soc Series B Stat Methodol* 57(1):289–300.
- 701 58. Ditty JL, Williams SB, Golden SS (2003) A cyanobacterial circadian timing mechanism.  
702 *Annu Rev Genet* 37:513–543.

703

704



## 705 **Figure Legends**

706

707 **Fig 1. Using RB-TnSeq to assess genetic contributions to fitness in LDC.** A dense pooled  
708 mutant library containing unique known bar-code identification sequences linked to each  
709 individual gene insertion was used to estimate the fitness of each loss-of-function mutant grown  
710 under alternating light-dark conditions. The library was grown under continuous light and  
711 sampled to determine the baseline abundance of each strain in the population prior to transfer  
712 to photobioreactors which were then either exposed to continuous light or alternating 12-h light -  
713 12-h dark regimes. Bar-code quantification of the library population in both conditions was  
714 normalized to the baseline and compared against each other to estimate the fitness  
715 consequences of loss of function of each gene specific to growth in LDC.

716 **Fig 2. LDC Rb-TnSeq screen results breakdown.** (A) Of the 2723 genes in the genome, 1872  
717 genes were analyzed in the library population. Of those, data from mutants with loss-of-function  
718 of 1420 genes fell below our false discovery threshold. Of the remaining 452 genes, 220 had  
719 moderate to strong fitness effects. (B) A volcano plot highlighting genes of interest. Red-shaded  
720 region indicates an estimated fitness decrease in LDC and the green-shaded region indicates a  
721 fitness increase. (C) Functional category composition of genes that gave strong fitness scores.  
722 Categories based on COG classification or GO ID. Green corresponds to strong fitness  
723 increases; Red corresponds to strong fitness decreases.

724 **Fig. 3. Connection between essential night-time metabolism and RpaA regulation.** (A) A  
725 metabolic map showing the reactions (red) that are controlled by genes that are essential in  
726 LDC. Reactions that are non-essential (solid arrows) or essential (dashed arrows) in CLC are  
727 also indicated. Stars mark NADPH-generating reactions. \* gene was not revealed in the  
728 screen but is known to be required in LDC; # minor LDC decrease measured, likely due to  
729 fitness contribution in CLC which affects calculation (B) LDC-sensitive mutant population  
730 enriched for genes known to be positively regulated by RpaA.

731 **Fig. 4. *kaiA* mutant growth and *cikA*-based intervention in LDC.** (A) Dilution spot-plate  
732 growth of strains in CLC and LDC. A representation of the genotype of each strain is portrayed  
733 in SI Appendix, Fig. S1. (B) *cikA* mutant fitness increase in competition with WT in LDC and  
734 CLC. (C) Growth of liquid cultures in replicate photobioreactors in LDC. Vertical shaded areas  
735 represent dark conditions. Data points = mean (SD); n = 2.

736 **Fig. 5. Bioluminescence levels from *kaiBC* reporter in mutant backgrounds.** The intensity  
737 of  $P_{kaiBC}::luc$  output signal correlates with LDC sensitivity. Rhythms were measured in CLC  
738 conditions driven by the *kaiBC* promoter after exposure to 72 h of entraining LDC that includes a  
739 low-light intensity that is permissive for the mutants. Shaded areas indicate the SEM of 4  
740 biological replicates.

741 **Fig. 6. RpaA status correlates with growth success in LDC.** (A) RpaA phosphorylation at  
742 dusk (after 12 h light). Box plot above the representative Phos-tag immunoblot shows values for  
743 replicate densitometry analysis (n ≥ 4) of P-RpaA/total RpaA. (B) Immunoblot shows levels of  
744 KaiC from cells taken at dusk. C. Phos-tag immunoblot shows RpaA phosphorylation across the  
745 light-dark transitions with samples taken just prior to the lights turning on (dawn) or off (dusk).  
746 (D) H<sub>2</sub>DCFDA fluorescence over a 12-h dark period during an LDC, indicating total cellular ROS  
747 in WT, *kaiA<sup>del</sup>*, and *kaiA<sup>del</sup>cikA*. The shaded area indicates the period of darkness following a 12-  
748 h light period. P-RpaA denotes phosphorylated protein.

749 **Fig. 7. CikA-activating complex formation measured by fluorescence anisotropy.** (A)  
750 Kinetics of 6-IAF-labeled KaiB binding to WT KaiC (upper right) or phosphomimetic KaiCs  
751 (KaiC-AE, or KaiC-EA, left) in the absence (red) or presence (blue) of CikA, with 0.5 mM ATP +  
752 0.5 mM ADP. Controls are shown for KaiB-only (black) and for KaiB and CikA without KaiC  
753 (green, lower right). (B) Binding of KaiB to WT KaiC (right) or KaiC-AE (left) in the absence and  
754 presence of CikA with 1.0 mM ATP, using the same color codes as for (A).

755 **Fig. 8. Model for LDC sensitivity due to circadian clock dysfunction.** (A) Conventionally, the  
756 role of KaiA is primarily to bind to the A-loops of the CII domain of KaiC, stimulating its  
757 autophosphorylation and consequently increasing the activity of the kinase SasA; this activity in  
758 turn results in accumulation of phosphorylated RpaA throughout the day. P-RpaA initiates the  
759 expression of circadian-controlled night-time class 1 genes at dusk. Yellow and red dots on  
760 KaiC represent phosphorylation at S431 and T432, respectively. A red dot also represents  
761 phosphorylation on RpaA. The rare fold-switch of KaiB is represented by different orange  
762 shapes. The major conformational change of KaiA bound to the CII A-loops versus the KaiB ring  
763 and the exposure of the KaiB binding site on the CI ring of KaiC are also depicted. (B) Without  
764 KaiA, KaiC phosphorylation is suppressed and, thus, SasA kinase activity is diminished,  
765 reducing the pools of SasA-mediated P-RpaA. A small fraction of the KaiC pool that is  
766 phosphorylated even in the absence of KaiA can bind KaiB. CikA has access to these KaiC-  
767 bound KaiB proteins that are usually occupied by KaiA, and becomes hyperactive; excessive  
768 CikA phosphatase activity extinguishes intracellular pools of P-RpaA and eliminates the cell's  
769 ability to express genes needed for survival in LDC. Figure modified from (11). The dotted line in  
770 the panel B graph represents the WT levels of P-RpaA from panel A.

771

772 **Figures**

773 **Figure 1**

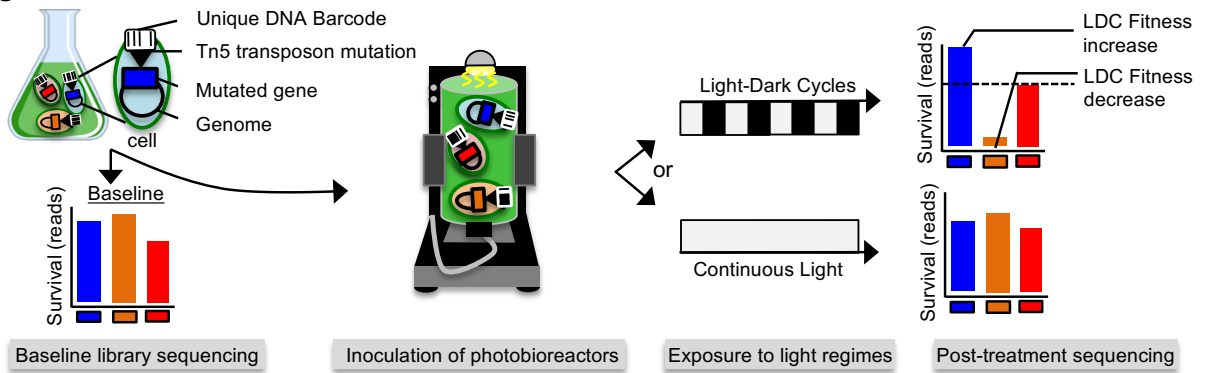

774  
775

Figure 2

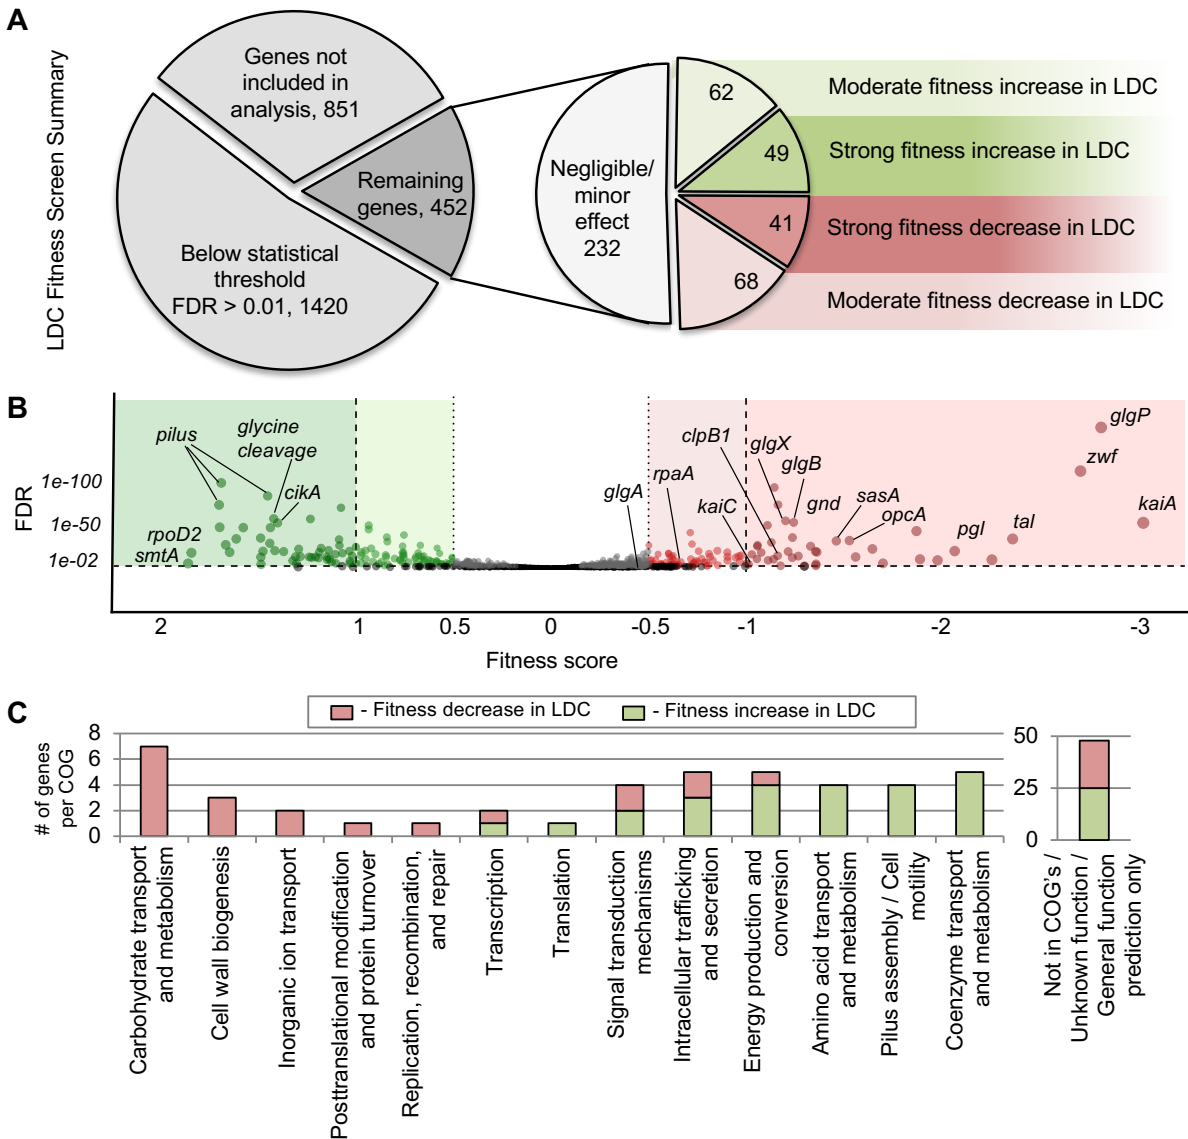



779 **Figure 3**

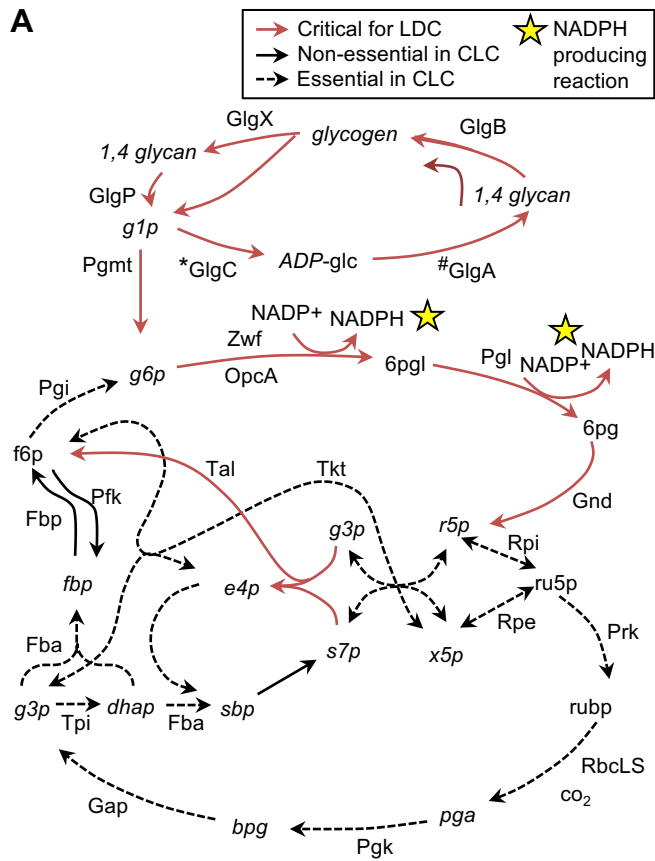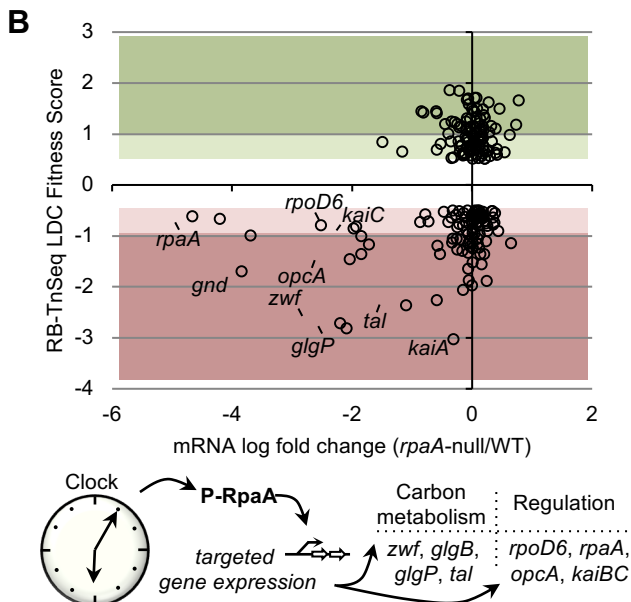

780  
781

782 **Figure 4**

**A**

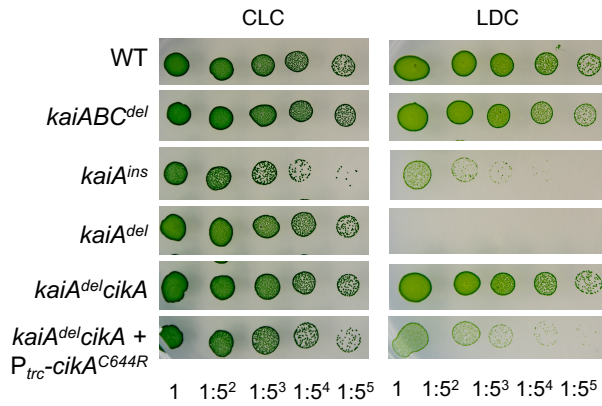

**B**

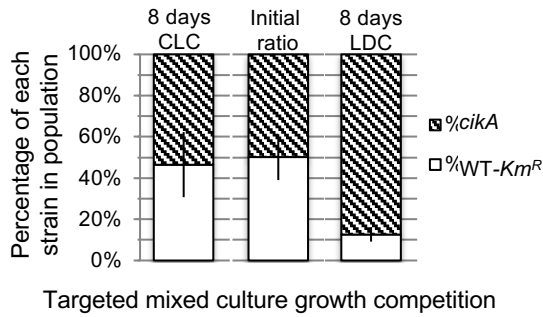

**C**

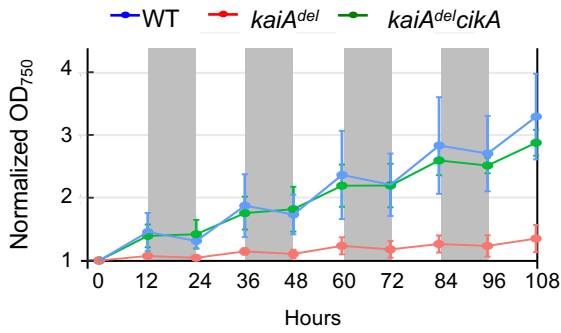

783

784

785 **Figure 5**

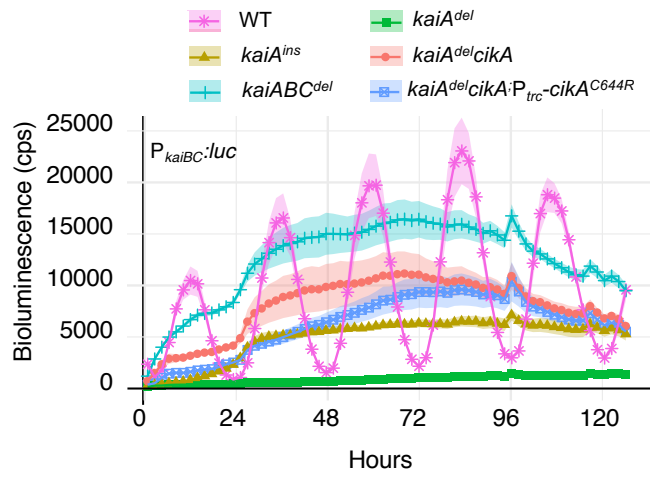

786

787

788 **Figure 6**

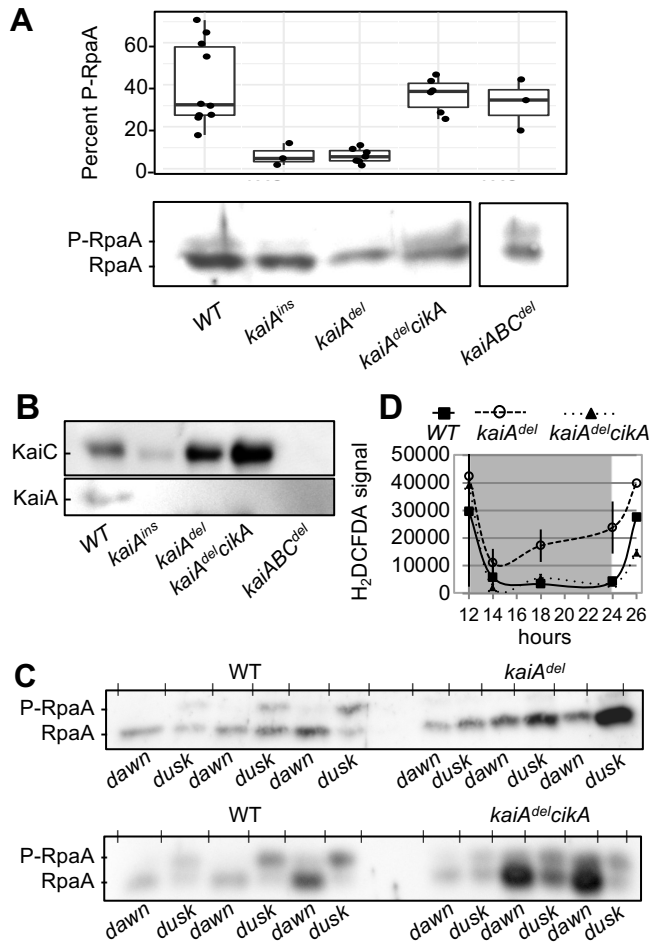

789

790



791 **Figure 7**

**A**

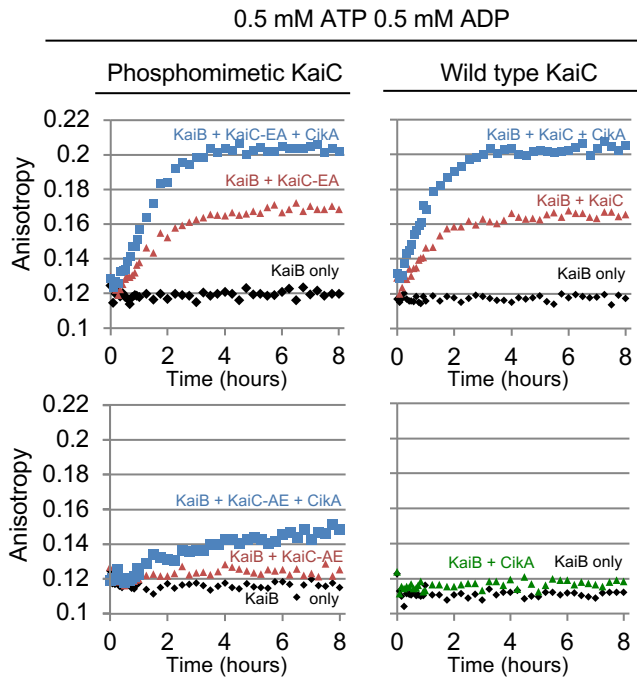

**B**

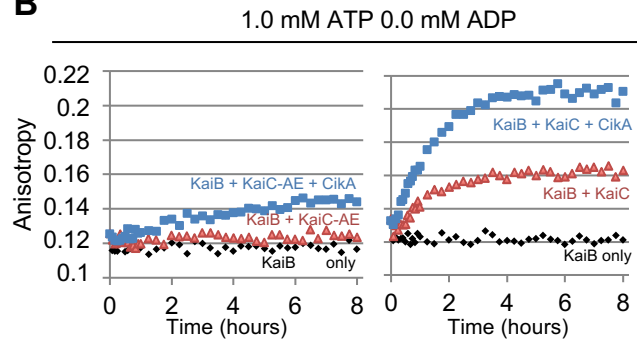

792

793

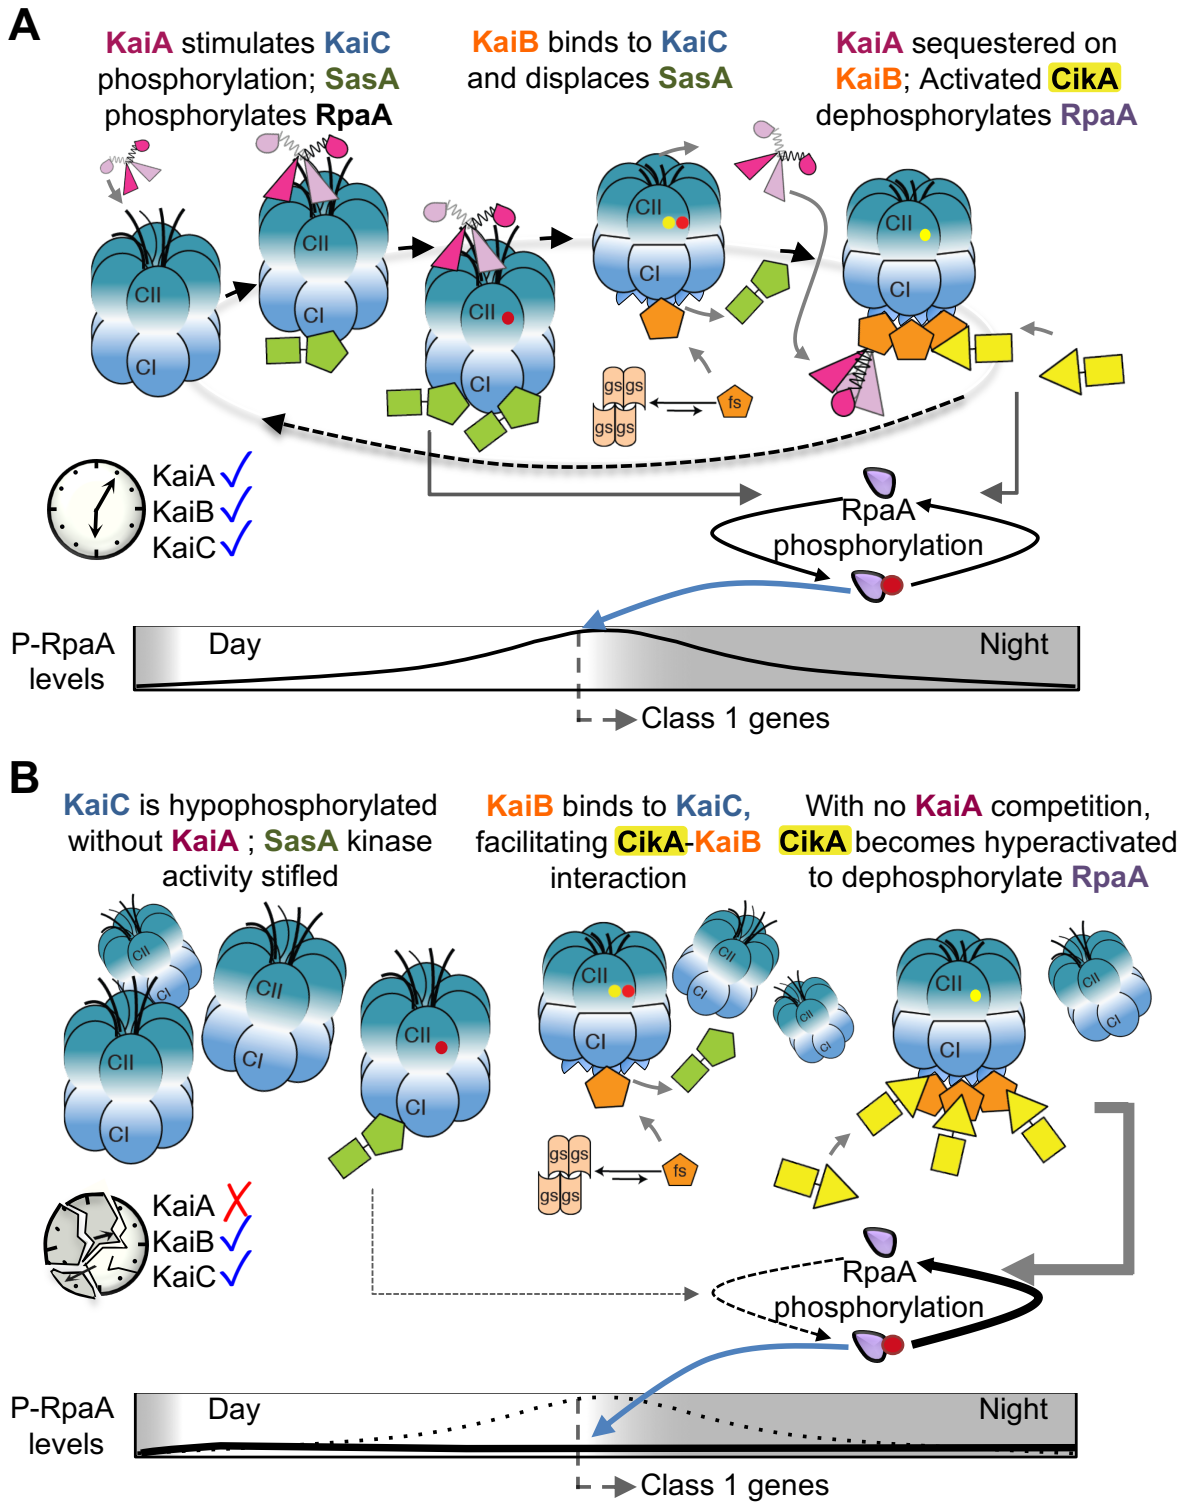

Source: https://www.biorxiv.org/content/10.1101/283812v2.full.pdf
